# Supplementary material
Source: publisher site journal article supplement (https://www.dovepress.com/article/532749)
Supplement: Supplementary file 1 [file 532749%20Supplementary%20Material%20v3.docx]

**Supplemental Figures**

Assessed for eligibility (n=127)

Excluded (n= 15)

  Bleeding or nerve trauma (n=8)

  Postoperative infection (n=5)

  Other reasons (n=2)

Analysed (n=72 )
 Excluded from analysis (n=0)

Lost to follow-up (n=0)

Allocated to Group plantar incision (n=72 )

Lost to follow-up (n=0)

Allocated to Group SNI (n= 40)

Analysed (n= 40 )
 Excluded from analysis (n=0)

## Allocation

## Analysis

## Follow-Up

Randomized (n=112)

## Enrollment

**Figure S1.** Flow diagram of animal inclusion, exclusion, and allocation.

**Figure S2.** Relationship between ropivacaine concentration and UV-Vis absorption intensity at 263 nm (black line). Red line is the linear fitting line.


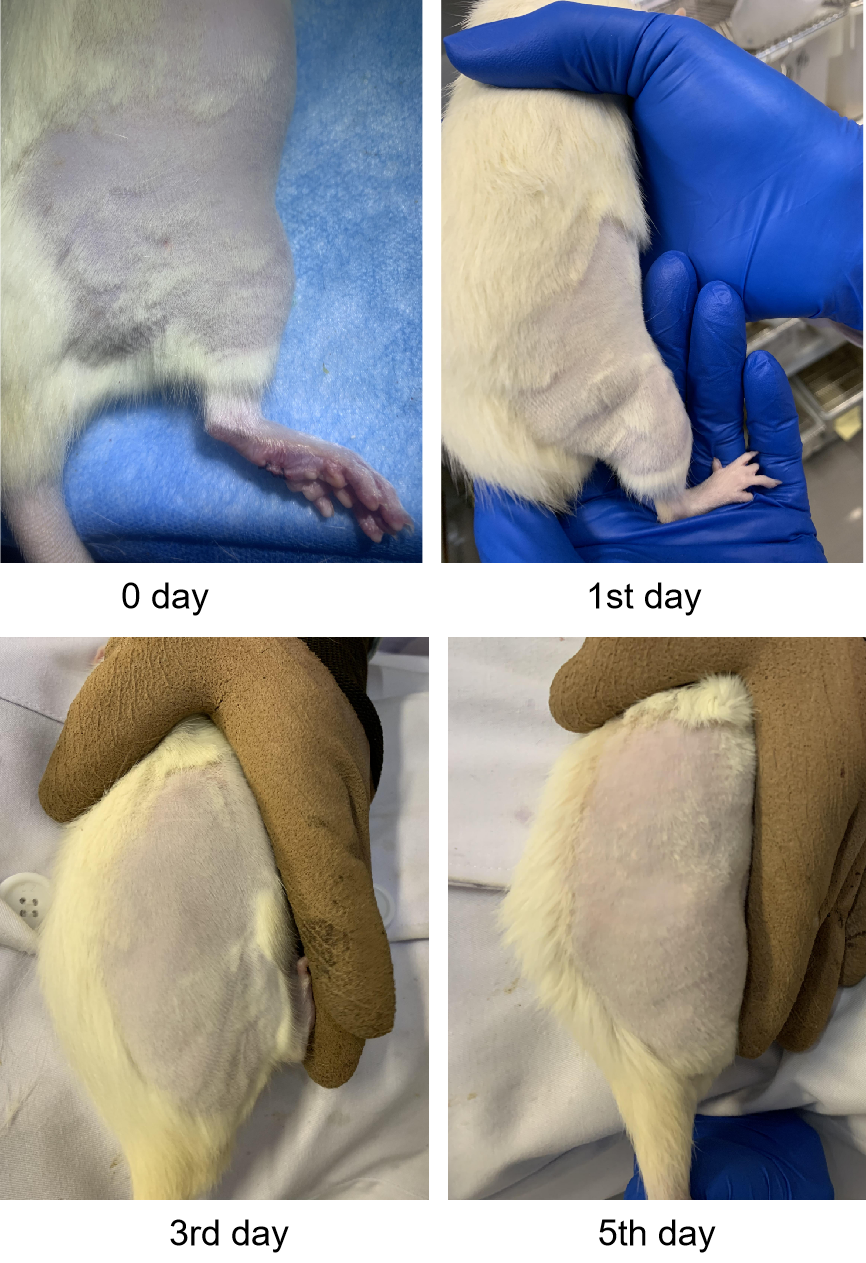


**Figure S3.** Photograph of the injected site after the perisciatic nerve injection of APRMs.


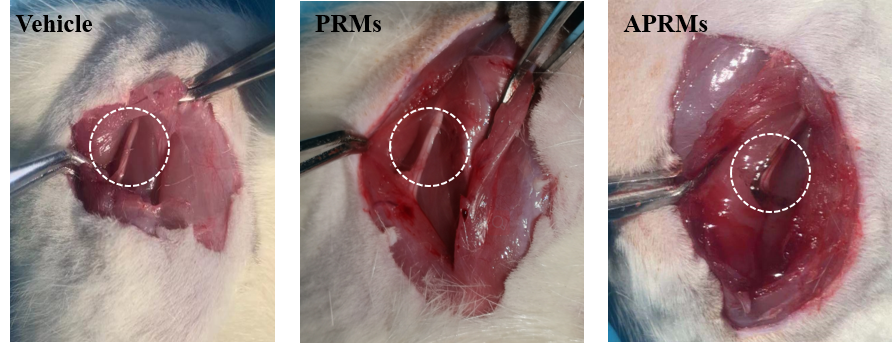


**Figure S4.** Photograph of the sciatic nerve after the perisciatic nerve injection of vehicle, PRMs, and APRMs. The dotted white marked area indicates the sciatic nerve at the site of injection.
